# Supplementary material for: Methylmercury formation in biofilms of Geobacter sulfurreducens
Source: Frontiers journal article supplement (doi:10.3389/fmicb.2023.1079000), 2023-01-13
Supplement: Data_Sheet_1.PDF [file Data_Sheet_1.PDF]

## Supporting information

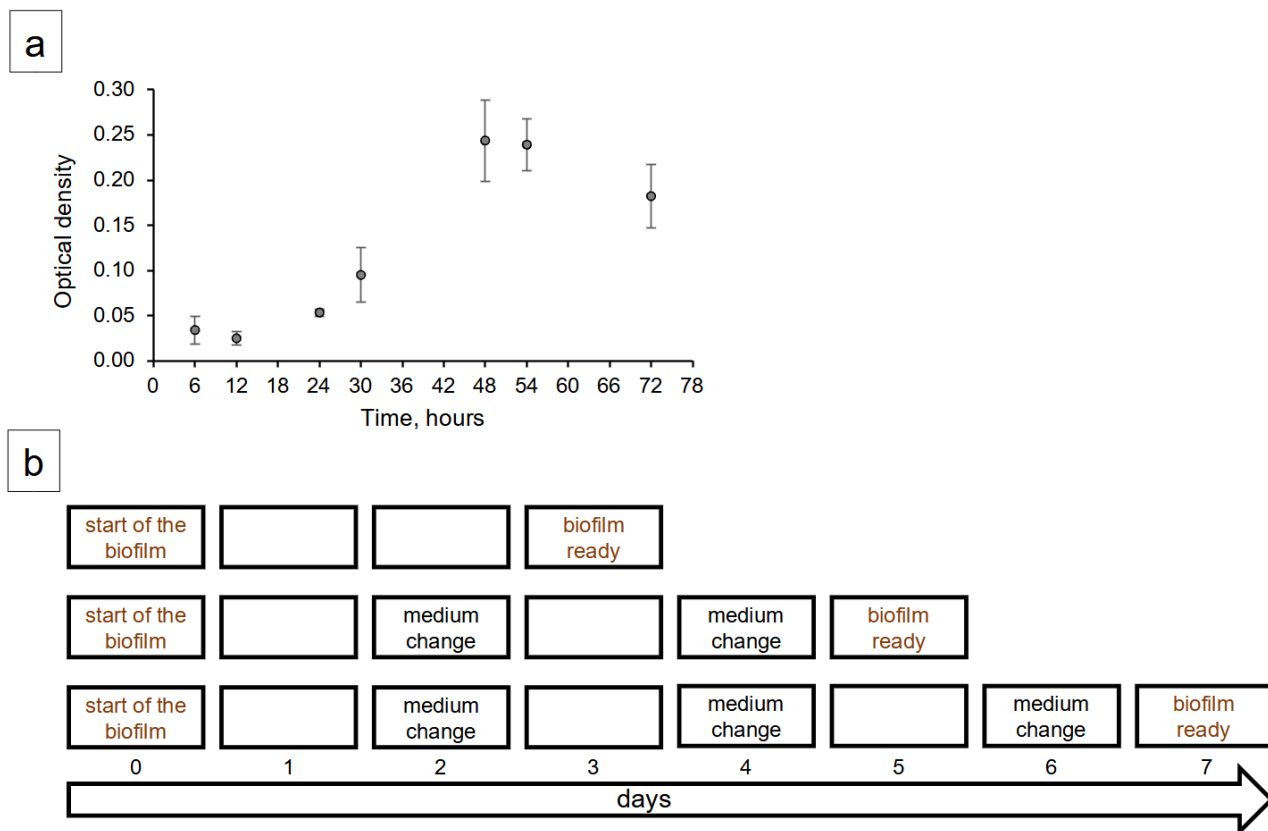

Figure S11. Preparation of *G. sulfurreducens* biofilms: a) time evolution of the optical density of *G. sulfurreducens* planktonic culture in the standard nutritive medium, b) schematic representation of the procedure for obtaining 3-, 5- or 7-day-old biofilms

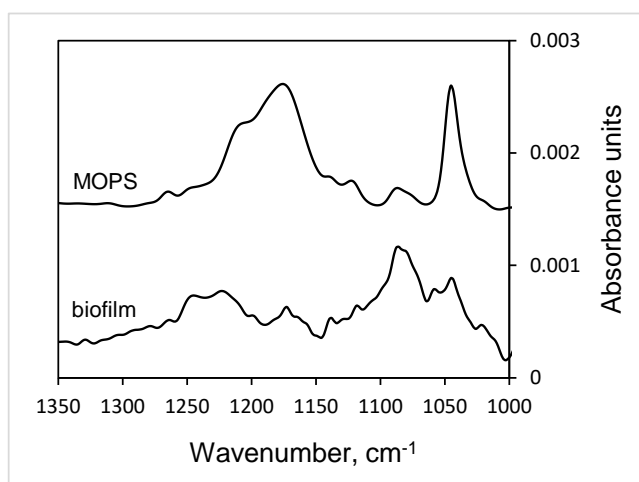

Figure S12. ATR-FTIR spectra of MOPS aqueous solution and *G. sulfurreducens* biofilm pellet suspended in the assay medium containing MOPS. A slight contribution of MOPS in the biofilm spectrum can be seen at around 1050 and 1175 cm⁻¹ due to progressive adsorption of MOPS on the ATR-crystal during spectrum recording.
